# Supplementary material for: Epigenetic Control of Plant Response to Heavy Metal Stress: A New View on Aluminum Tolerance
Source: Front Plant Sci. 2020 Dec 16;11:602625. doi: 10.3389/fpls.2020.602625 (PMC7772216; doi:10.3389/fpls.2020.602625)
Supplement: Supplementary file 2 [file Table_2.XLSX]

## Sheet: Suppl_table1
Source	Species/Cultivar	GENES	CHR	Chromosome	Start	End	Annotation	IR64 (SNPs)	PK (SNPs)	NIPPONBARE (SNPs)	PARALOGOUS
Arbelaez et al. 2017	Oryza sativa cv. IR64	LOC_Os01g01660	ChrUn	1	327128	328451	isoflavone reductase, putative, expressed	0	0	0	0
Arenhart et al. 2014	Oryza sativa cv. Nipponbare	LOC_Os01g03950	ChrUn	1	1698203	1703090	glycosyl hydrolase family 31 putative expressed	0	0	0	0
Arbelaez et al. 2017	Oryza sativa cv. IR64	LOC_Os01g06220	ChrUn	1	2957066	2958443	gibberellin receptor GID1L2, putative, expressed	1	0	0	0
Arenhart et al. 2014	Oryza sativa cv. Nipponbare	LOC_Os01g07530	ChrUn	1	3598418	3602211	uncharacterized glycosyltransferase putative expressed	0	0	0	0
Arbelaez et al. 2017	Oryza sativa cv. IR64	LOC_Os01g07730	ChrUn	1	3711212	3713653	phosphate/phosphoenolpyruvate translocator-related protein, putative, expressed	0	0	0	0
Arenhart et al. 2014	Oryza sativa cv. Nipponbare	LOC_Os01g09220	ChrUn	1	4646427	4648260	transposon protein putative CACTA En Spm sub-class expressed	0	0	0	1
Arenhart et al. 2014	Oryza sativa cv. Nipponbare	LOC_Os01g11620	ChrUn	1	6267440	6270903	GDSL-like lipase acylhydrolase putative expressed	0	0	0	0
Arenhart et al. 2014	Oryza sativa cv. Nipponbare	LOC_Os01g12070	ChrUn	1	6564673	6568151	endoglucanase precursor putative expressed	0	0	0	0
Arbelaez et al. 2017	Oryza sativa cv. IR64	LOC_Os01g15810	ChrUn	1	8903333	8905428	peroxidase precursor, putative, expressed	0	0	0	0
Arenhart et al. 2014	Oryza sativa cv. Nipponbare / Oryza sativa cv. IR64	LOC_Os01g24550	ChrUn	1	13837906	13839339	fruit bromelain precursor putative expressed	0	2	0	0
Arbelaez et al. 2017	Oryza sativa cv. Nipponbare / Oryza sativa cv. IR64	LOC_Os01g24570	ChrUn	1	13847992	13849036	fruit bromelain precursor, putative, expressed	0	0	0	1
Arbelaez et al. 2017	Oryza sativa cv. IR64	LOC_Os01g24600	ChrUn	1	13859262	13860625	fruit bromelain precursor, putative, expressed	1	3	0	0
Arenhart et al. 2014	Oryza sativa cv. Nipponbare	LOC_Os01g24710	ChrUn	1	13903153	13904715	jacalin-like lectin domain containing protein expressed	2	1	0	0
Arenhart et al. 2014	Oryza sativa cv. Nipponbare	LOC_Os01g31890	ChrUn	1	17470274	17471520	transposon protein putative unclassified expressed	31	6	0	1
Arbelaez et al. 2017	Oryza sativa cv. IR64	LOC_Os01g32670	ChrUn	1	17911523	17912150	expressed protein	0	0	0	1
Arbelaez et al. 2017	Oryza sativa cv. IR64	LOC_Os01g32770	ChrUn	1	17975816	17977327	DUF260 domain containing protein, putative, expressed	0	0	0	0
Arbelaez et al. 2017	Oryza sativa cv. IR64	LOC_Os01g38840	ChrUn	1	21788887	21790926	TKL_IRAK_DUF26-le.1 - DUF26 kinases have homology to DUF26 containing loci, expressed	0	0	0	0
Arbelaez et al. 2017	Oryza sativa cv. IR64	LOC_Os01g41430	ChrUn	1	23456074	23458037	UDP-glucoronosyl and UDP-glucosyl transferase, putative, expressed	0	0	0	0
Arbelaez et al. 2017	Oryza sativa cv. IR64	LOC_Os01g41810	ChrUn	1	23673292	23675869	cytochrome P450 72A1, putative, expressed	53	16	0	0
Arbelaez et al. 2017	Oryza sativa cv. IR64	LOC_Os01g42380	ChrUn	1	24075065	24082181	pleiotropic drug resistance protein, putative, expressed	1	0	0	0
Arbelaez et al. 2017	Oryza sativa cv. IR64	LOC_Os01g43720	ChrUn	1	25055772	25058195	cytochrome P450 72A1, putative, expressed	0	0	0	1
Arbelaez et al. 2017	Oryza sativa cv. IR64	LOC_Os01g43740	ChrUn	1	25060764	25063609	cytochrome P450 72A1, putative, expressed	0	0	0	1
Arbelaez et al. 2017	Oryza sativa cv. IR64	LOC_Os01g43750	ChrUn	1	25066171	25068299	cytochrome P450 72A1, putative, expressed	0	1	0	0
Arbelaez et al. 2017	Oryza sativa cv. IR64	LOC_Os01g43760	ChrUn	1	25070716	25072705	cytochrome P450 72A1, putative, expressed	2	0	0	1
Arbelaez et al. 2017	Oryza sativa cv. IR64	LOC_Os01g43774	ChrUn	1	25073849	25078549	cytochrome P450 72A1, putative, expressed	0	18	0	0
Arenhart et al. 2014	Oryza sativa cv. Nipponbare	LOC_Os01g44050	ChrUn	1	25234661	25238165	siroheme synthase putative expressed	0	0	0	0
Arenhart et al. 2014	Oryza sativa cv. Nipponbare	LOC_Os01g45250	ChrUn	1	25681570	25683076	DUF1645 domain containing protein putative expressed	0	0	0	0
Arenhart et al. 2014	Oryza sativa cv. Nipponbare	LOC_Os01g45914	ChrUn	1	26087572	26088335	expressed protein	0	0	0	1
Arbelaez et al. 2017	Oryza sativa cv. IR64	LOC_Os01g50100	ChrUn	1	28786109	28793300	ABC transporter, ATP-binding protein, putative, expressed	1	2	0	0
Arbelaez et al. 2017	Oryza sativa cv. IR64	LOC_Os01g51360	ChrUn	1	29529726	29532847	lipase, putative, expressed	0	0	0	0
Arbelaez et al. 2017	Oryza sativa cv. IR64	LOC_Os01g53090	ChrUn	1	30512276	30521565	pathogen-related protein, putative, expressed	9	12	0	0
Arbelaez et al. 2017	Oryza sativa cv. IR64	LOC_Os01g53350	ChrUn	1	30655289	30657194	anthocyanidin 5,3-O-glucosyltransferase, putative, expressed	0	1	0	1
Arbelaez et al. 2017	Oryza sativa cv. IR64	LOC_Os01g57470	ChrUn	1	33207652	33208693	EF hand family protein, putative, expressed	0	0	0	0
Arenhart et al. 2014	Oryza sativa cv. Nipponbare	LOC_Os01g64470	ChrUn	1	37412000	37413011	harpin-induced protein 1 domain containing protein expressed	0	0	0	0
Arbelaez et al. 2017	Oryza sativa cv. IR64	LOC_Os01g65830	ChrUn	1	38224419	38226031	acyl-desaturase, chloroplast precursor, putative, expressed	0	0	0	0
Arenhart et al. 2014	Oryza sativa cv. Nipponbare	LOC_Os01g65880	ChrUn	1	38254049	38257687	nodulin MtN3 family protein putative expressed	1	1	0	0
Arbelaez et al. 2017	Oryza sativa cv. IR64	LOC_Os01g67010	ChrUn	1	38916092	38918071	expressed protein	0	0	0	1
Arenhart et al. 2014	Oryza sativa cv. Nipponbare / Oryza sativa cv. IR64	LOC_Os01g69010	ChrUn	1	40093713	40096983	MATE efflux protein putative expressed	0	1	0	0
Arenhart et al. 2014	Oryza sativa cv. Nipponbare / Oryza sativa cv. IR64	LOC_Os01g70850	ChrUn	1	41004288	41006137	esterase putative expressed	0	0	0	0
Arbelaez et al. 2017	Oryza sativa cv. IR64	LOC_Os01g70970	ChrUn	1	41079469	41082009	protein kinase, putative, expressed	0	0	0	0
Arenhart et al. 2014	Oryza sativa cv. Nipponbare	LOC_Os01g71340	ChrUn	1	41346574	41348411	glycosyl hydrolases family 17 putative expressed	0	0	0	0
Arbelaez et al. 2017	Oryza sativa cv. IR64	LOC_Os01g71400	ChrUn	1	41370715	41371949	glycosyl hydrolases family 17, putative, expressed	0	0	0	0
Arenhart et al. 2014	Oryza sativa cv. Nipponbare	LOC_Os01g71420	ChrUn	1	41384286	41386417	Ser Thr protein phosphatase family protein putative expressed	0	0	0	0
Arbelaez et al. 2017	Oryza sativa cv. IR64	LOC_Os01g72150	ChrUn	1	41846413	41847370	glutathione S-transferase, putative, expressed	0	0	0	0
Arenhart et al. 2014	Oryza sativa cv. Nipponbare	LOC_Os01g72370	ChrUn	1	41971444	41978408	helix-loop-helix DNA-binding domain containing protein expressed	0	0	0	0
Arenhart et al. 2014	Oryza sativa cv. Nipponbare	LOC_Os01g72530	ChrUn	1	42073984	42074982	OsCML31 - Calmodulin-related calcium sensor protein expressed	0	0	0	0
Arbelaez et al. 2017	Oryza sativa cv. IR64	LOC_Os01g72900	ChrUn	1	42281272	42281973	abscisic stress-ripening, putative, expressed	0	0	0	0
Arbelaez et al. 2017	Oryza sativa cv. IR64	LOC_Os01g72910	ChrUn	1	42282832	42283632	abscisic stress-ripening, putative, expressed	1	0	0	1
Arbelaez et al. 2017	Oryza sativa cv. IR64	LOC_Os02g03710	Chr2	2	1558479	1559143	UP-9A, putative, expressed	0	0	0	0
Arenhart et al. 2014	Oryza sativa cv. Nipponbare	LOC_Os02g03870	Chr2	2	1643966	1648808	periplasmic beta-glucosidase precursor putative expressed	2	1	0	0
Arbelaez et al. 2017	Oryza sativa cv. IR64	LOC_Os02g03900	Chr2	2	1658576	1662644	metal transporter Nramp6, putative, expressed	0	0	0	0
Arbelaez et al. 2017	Oryza sativa cv. IR64	LOC_Os02g08330	Chr2	2	4424439	4426620	gp176, putative, expressed	0	0	0	0
Arbelaez et al. 2017	Oryza sativa cv. IR64	LOC_Os02g08440	Chr2	2	4542762	4544983	WRKY71, expressed	0	0	0	0
Arenhart et al. 2014	Oryza sativa cv. Nipponbare / Oryza sativa cv. IR64	LOC_Os02g09390	Chr2	2	4824246	4825855	cytochrome P450 putative expressed	0	0	0	0
Arenhart et al. 2014	Oryza sativa cv. Nipponbare	LOC_Os02g14430	Chr2	2	7938409	7939842	peroxidase precursor putative expressed	14	17	0	0
Arbelaez et al. 2017	Oryza sativa cv. IR64	LOC_Os02g18410	Chr2	2	10714983	10716780	salt stress root protein RS1, putative, expressed	0	1	0	1
Arbelaez et al. 2017	Oryza sativa cv. IR64	LOC_Os02g20360	Chr2	2	11997094	12002633	tyrosine aminotransferase, putative, expressed	20	5	0	0
Arenhart et al. 2014	Oryza sativa cv. Nipponbare	LOC_Os02g36210	Chr2	2	21841059	21847837	ent-kaurene synthase chloroplast precursor putative expressed	0	28	0	0
Arenhart et al. 2014	Oryza sativa cv. Nipponbare	LOC_Os02g37290	Chr2	2	22550981	22551422	heavy metal associated domain containing protein expressed	2	0	1	0
Arenhart et al. 2014	Oryza sativa cv. Nipponbare	LOC_Os02g38230	Chr2	2	23121133	23123149	high affinity nitrate transporter putative expressed	0	0	0	1
Arbelaez et al. 2017	Oryza sativa cv. IR64	LOC_Os02g38820	Chr2	2	23465969	23468071	expressed protein	8	8	0	1
Arbelaez et al. 2017	Oryza sativa cv. IR64	LOC_Os02g39620	Chr2	2	23903894	23905003	ATOZI1, putative, expressed	5	6	0	0
Arenhart et al. 2014	Oryza sativa cv. Nipponbare	LOC_Os02g51970	Chr2	2	31823825	31825264	phosphate-induced protein 1 conserved region domain containing protein expressed	4	0	0	0
Arenhart et al. 2014	Oryza sativa cv. Nipponbare	LOC_Os02g52000	Chr2	2	31834808	31836353	phosphate-induced protein 1 conserved region domain containing protein expressed	0	0	0	0
Arbelaez et al. 2017	Oryza sativa cv. IR64	LOC_Os02g57350	Chr2	2	35130674	35131878	expressed protein	6	0	0	0
Arbelaez et al. 2017	Oryza sativa cv. IR64	LOC_Os03g02040	Chr3	3	646947	649469	remorin, putative, expressed	0	0	0	0
Arbelaez et al. 2017	Oryza sativa cv. IR64	LOC_Os03g02750	Chr3	3	1033961	1036671	OsSub25 - Putative Subtilisin homologue, expressed	0	0	0	0
Arbelaez et al. 2017	Oryza sativa cv. IR64	LOC_Os03g03724	Chr3	3	1667248	1667963	expressed protein	0	0	0	1
Arenhart et al. 2014	Oryza sativa cv. Nipponbare / Oryza sativa cv. IR64	LOC_Os03g04060	Chr3	3	1860427	1861786	CHIT16 - Chitinase family protein precursor expressed	0	0	0	0
Arenhart et al. 2014	Oryza sativa cv. Nipponbare	LOC_Os03g04550	Chr3	3	2123688	2125737	expressed protein	0	0	0	1
Arenhart et al. 2014	Oryza sativa cv. Nipponbare	LOC_Os03g05334	Chr3	3	2608931	2609586	expressed protein	0	0	0	1
Arenhart et al. 2014	Oryza sativa cv. Nipponbare	LOC_Os03g05750	Chr3	3	2866315	2868242	heavy-metal-associated domain-containing protein putative expressed	0	0	0	0
Arenhart et al. 2014	Oryza sativa cv. Nipponbare	LOC_Os03g05910	Chr3	3	2961746	2964306	expressed protein	0	1	0	0
Arenhart et al. 2014	Oryza sativa cv. Nipponbare	LOC_Os03g11400	Chr3	3	5865076	5869280	targeting protein-related putative expressed	1	0	0	0
Arenhart et al. 2014	Oryza sativa cv. Nipponbare	LOC_Os03g11950	Chr3	3	6264770	6267879	SEC14 cytosolic factor family protein putative expressed	0	0	0	0
Arbelaez et al. 2017	Oryza sativa cv. IR64	LOC_Os03g13540	Chr3	3	7322330	7325484	Ser/Thr protein phosphatase family protein, putative, expressed	0	2	0	0
Arenhart et al. 2014	Oryza sativa cv. Nipponbare	LOC_Os03g15320	Chr3	3	8384206	8386091	glyoxal oxidase-related putative expressed	0	0	0	0
Arbelaez et al. 2017	Oryza sativa cv. IR64	LOC_Os03g16020	Chr3	3	8833913	8834377	hsp20/alpha crystallin family protein, putative, expressed	0	0	0	1
Arbelaez et al. 2017	Oryza sativa cv. IR64	LOC_Os03g16030	Chr3	3	8834823	8835802	hsp20/alpha crystallin family protein, putative, expressed	0	0	0	1
Arbelaez et al. 2017	Oryza sativa cv. IR64	LOC_Os03g16610	Chr3	3	9167558	9170334	laccase precursor protein, putative, expressed	0	0	0	0
Arbelaez et al. 2017	Oryza sativa cv. IR64	LOC_Os03g16950	Chr3	3	9421689	9422925	cysteine-rich repeat secretory protein 55 precursor, putative, expressed	0	2	0	0
Arenhart et al. 2014	Oryza sativa cv. Nipponbare	LOC_Os03g18030	Chr3	3	10038840	10044429	leucoanthocyanidin dioxygenase putative expressed	0	0	0	1
Arenhart et al. 2014	Oryza sativa cv. Nipponbare	LOC_Os03g19420	Chr3	3	10926469	10927950	nicotianamine synthase putative expressed	2	0	0	0
Arenhart et al. 2014	Oryza sativa cv. Nipponbare	LOC_Os03g19427	Chr3	3	10929483	10930895	nicotianamine synthase putative expressed	2	1	0	1
Arenhart et al. 2014	Oryza sativa cv. Nipponbare	LOC_Os03g21970	Chr3	3	12587544	12589847	basic helix-loop-helix domain containing protein expressed	4	1	0	0
Arbelaez et al. 2017	Oryza sativa cv. IR64	LOC_Os03g22010	Chr3	3	12611811	12617166	peroxidase precursor, putative, expressed	0	2	0	0
Arenhart et al. 2014	Oryza sativa cv. Nipponbare	LOC_Os03g25340	Chr3	3	14480543	14482433	peroxidase precursor putative expressed	0	0	0	0
Arenhart et al. 2014	Oryza sativa cv. Nipponbare	LOC_Os03g25370	Chr3	3	14504838	14505973	peroxidase precursor putative expressed	0	18	0	0
Arenhart et al. 2014	Oryza sativa cv. Nipponbare	LOC_Os03g30470	Chr3	3	17390790	17391871	CHIT4 - Chitinase family protein precursor expressed	11	3	0	1
Arbelaez et al. 2017	Oryza sativa cv. IR64	LOC_Os03g42130	Chr3	3	23450164	23452171	gibberellin 20 oxidase 2, putative, expressed	0	0	1	1
Arenhart et al. 2014	Oryza sativa cv. Nipponbare	LOC_Os03g44890	Chr3	3	25326521	25330063	anthranilate phosphoribosyltransferase putative expressed	5	0	0	0
Arenhart et al. 2014	Oryza sativa cv. Nipponbare	LOC_Os03g45960	Chr3	3	25972225	25973470	thaumatin putative expressed	0	0	0	0
Arenhart et al. 2014	Oryza sativa cv. Nipponbare	LOC_Os03g46070	Chr3	3	26034426	26035357	thaumatin putative expressed	0	0	0	0
Arenhart et al. 2014	Oryza sativa cv. Nipponbare	LOC_Os03g54000	Chr3	3	30959598	30963774	oligopeptide transporter putative expressed	1	7	0	0
Arbelaez et al. 2017	Oryza sativa cv. IR64	LOC_Os03g55240	Chr3	3	31440748	31446119	cytochrome P450, putative, expressed	0	3	0	0
Arenhart et al. 2014	Oryza sativa cv. Nipponbare / Oryza sativa cv. IR64	LOC_Os03g55290	Chr3	3	31464840	31465625	GASR3 - Gibberellin-regulated GASA GAST Snakin family protein precursor expressed	4	0	0	0
Arenhart et al. 2014	Oryza sativa cv. Nipponbare	LOC_Os04g01690	Chr4	4	463738	467284	pyridoxal-dependent decarboxylase protein putative expressed	22	11	0	0
Arenhart et al. 2014	Oryza sativa cv. Nipponbare	LOC_Os04g09390	Chr4	4	5005077	5006210	HEV3 - Hevein family protein precursor expressed	0	0	0	0
Arenhart et al. 2014	Oryza sativa cv. Nipponbare	LOC_Os04g10010	Chr4	4	5385722	5387215	sex determination protein tasselseed-2 putative expressed	10	10	0	0
Arenhart et al. 2014	Oryza sativa cv. Nipponbare	LOC_Os04g10460	Chr4	4	5686452	5689491	amidase putative expressed	0	1	0	0
Arbelaez et al. 2017	Oryza sativa cv. IR64	LOC_Os04g24340	Chr4	4	13949076	13950277	phytase, putative, expressed	1	1	0	1
Arbelaez et al. 2017	Oryza sativa cv. IR64	LOC_Os04g24460	Chr4	4	14027986	14029187	phytase, putative, expressed	3	1	0	1
Arenhart et al. 2014	Oryza sativa cv. Nipponbare / Oryza sativa cv. IR64	LOC_Os04g27060	Chr4	4	16001490	16005331	oxidoreductase aldo keto reductase family protein putative expressed	0	0	0	0
Arenhart et al. 2014	Oryza sativa cv. Nipponbare	LOC_Os04g27190	Chr4	4	16057927	16068256	terpene synthase putative expressed	17	19	0	0
Arenhart et al. 2014	Oryza sativa cv. Nipponbare	LOC_Os04g31520	Chr4	4	18846262	18846975	RALFL21 - Rapid ALkalinization Factor RALF family protein precursor expressed	0	0	0	1
Arbelaez et al. 2017	Oryza sativa cv. IR64	LOC_Os04g33640	Chr4	4	20372913	20377959	glycosyl hydrolases family 17, putative, expressed	0	0	0	0
Arenhart et al. 2014	Oryza sativa cv. Nipponbare	LOC_Os04g37650	Chr4	4	22385358	22387707	xyloglucan fucosyltransferase putative expressed	0	0	0	0
Arbelaez et al. 2017	Oryza sativa cv. IR64	LOC_Os04g39380	Chr4	4	23435707	23436503	heavy metal transport/detoxification protein, putative, expressed	8	4	0	1
Arenhart et al. 2014	Oryza sativa cv. Nipponbare	LOC_Os04g41710	Chr4	4	24725907	24728710	expressed protein	62	96	0	0
Arenhart et al. 2014	Oryza sativa cv. Nipponbare / Oryza sativa cv. IR64	LOC_Os04g41750	Chr4	4	24744697	24746565	expressed protein	0	2	1	0
Arenhart et al. 2014	Oryza sativa cv. Nipponbare	LOC_Os04g43560	Chr4	4	25773341	25776243	no apical meristem protein putative expressed	0	0	0	0
Arenhart et al. 2014	Oryza sativa cv. Nipponbare	LOC_Os04g45520	Chr4	4	26931453	26932639	integral membrane protein putative expressed	0	0	0	0
Arenhart et al. 2014	Oryza sativa cv. Nipponbare	LOC_Os04g46630	Chr4	4	27645595	27647517	expansin precursor putative expressed	0	0	0	0
Arenhart et al. 2014	Oryza sativa cv. Nipponbare	LOC_Os04g46810	Chr4	4	27740050	27740811	LTPL1 - Protease inhibitor seed storage LTP family protein precursor expressed	0	0	0	0
Arenhart et al. 2014	Oryza sativa cv. Nipponbare	LOC_Os04g47320	Chr4	4	28091139	28095005	uncharacterized mscS family protein putative expressed	22	16	0	0
Arenhart et al. 2014	Oryza sativa cv. Nipponbare	LOC_Os04g47930	Chr4	4	28500006	28502492	aluminum-activated malate transporter putative expressed	0	28	0	0
Arenhart et al. 2014	Oryza sativa cv. Nipponbare	LOC_Os04g52090	Chr4	4	30939177	30940275	AP2 domain containing protein expressed	0	0	0	0
Arenhart et al. 2014	Oryza sativa cv. Nipponbare	LOC_Os04g52720	Chr4	4	31392876	31395185	Cupin domain containing protein expressed	1	0	0	0
Arbelaez et al. 2017	Oryza sativa cv. IR64	LOC_Os05g01920	Chr5	5	528789	529004	inhibitor I family protein, putative, expressed	0	0	0	0
Arbelaez et al. 2017	Oryza sativa cv. IR64	LOC_Os05g02750	Chr5	5	989743	990588	ABC transporter, membrane-spanning/permease subunit, putative, expressed	0	2	0	1
Arbelaez et al. 2017	Oryza sativa cv. IR64	LOC_Os05g09440	Chr5	5	5293555	5297419	NADP-dependent malic enzyme, chloroplast precursor, putative, expressed	3	2	0	0
Arenhart et al. 2014	Oryza sativa cv. Nipponbare	LOC_Os05g12630	Chr5	5	7249978	7251397	expressed protein	0	0	0	1
Arenhart et al. 2014	Oryza sativa cv. Nipponbare	LOC_Os05g31570	Chr5	5	18377097	18382814	disease resistance protein RGA4 putative expressed	0	2	0	1
Arbelaez et al. 2017	Oryza sativa cv. IR64	LOC_Os05g31830	Chr5	5	18535358	18536883	aspartyl protease family protein, putative, expressed	67	0	0	0
Arenhart et al. 2014	Oryza sativa cv. Nipponbare	LOC_Os05g34010	Chr5	5	20086679	20091534	peptide transporter PTR2 putative expressed	0	1	0	1
Arenhart et al. 2014	Oryza sativa cv. Nipponbare	LOC_Os05g34030	Chr5	5	20099150	20101168	peptide transporter PTR2 putative expressed	0	1	0	1
Arbelaez et al. 2017	Oryza sativa cv. IR64	LOC_Os05g35050	Chr5	5	20804018	20804898	ctr copper transporter family protein, putative, expressed	6	0	0	0
Arbelaez et al. 2017	Oryza sativa cv. IR64	LOC_Os05g39540	Chr5	5	23204531	23213279	metal cation transporter, putative, expressed	0	0	0	1
Arbelaez et al. 2017	Oryza sativa cv. IR64	LOC_Os05g42360	Chr5	5	24783655	24785311	expressed protein	0	0	0	1
Arbelaez et al. 2017	Oryza sativa cv. IR64	LOC_Os05g43040	Chr5	5	24997324	24999598	tetratricopeptide repeat domain containing protein, expressed	0	4	0	0
Arbelaez et al. 2017	Oryza sativa cv. IR64	LOC_Os05g44940	Chr5	5	26120363	26126935	protein kinase domain containing protein, expressed	12	0	1	1
Arbelaez et al. 2017	Oryza sativa cv. IR64	LOC_Os05g51470	Chr5	5	29506977	29509972	2-aminoethanethiol dioxygenase, putative, expressed	0	0	0	0
Arenhart et al. 2014	Oryza sativa cv. Nipponbare	LOC_Os06g03710	Chr6	6	1465499	1468600	DELLA protein SLR1 putative expressed	41	38	0	1
Arenhart et al. 2014	Oryza sativa cv. Nipponbare	LOC_Os06g03810	Chr6	6	1526536	1527625	berberine and berberine like domain containing protein expressed	10	0	0	1
Arenhart et al. 2014	Oryza sativa cv. Nipponbare	LOC_Os06g04230	Chr6	6	1784311	1784827	expressed protein	0	0	0	0
Arenhart et al. 2014	Oryza sativa cv. Nipponbare	LOC_Os06g08640	Chr6	6	4301557	4303121	transferase family protein putative expressed	0	0	0	0
Arenhart et al. 2014	Oryza sativa cv. Nipponbare	LOC_Os06g14406	Chr6	6	8043564	8049979	SYD putative expressed	1	0	0	1
Arenhart et al. 2014	Oryza sativa cv. Nipponbare	LOC_Os06g14420	Chr6	6	8068591	8070044	hydrolase NUDIX family domain containing protein expressed	0	1	0	0
Arenhart et al. 2014	Oryza sativa cv. Nipponbare	LOC_Os06g16380	Chr6	6	9349327	9350579	expressed protein	1	0	0	1
Arenhart et al. 2014	Oryza sativa cv. Nipponbare	LOC_Os06g29730	Chr6	6	17066919	17068618	RALFL28 - Rapid ALkalinization Factor RALF family protein precursor expressed	0	0	0	1
Arenhart et al. 2014	Oryza sativa cv. Nipponbare	LOC_Os06g32020	Chr6	6	18615683	18616803	THION6 - Plant thionin family protein precursor expressed	0	0	0	0
Arenhart et al. 2014	Oryza sativa cv. Nipponbare	LOC_Os06g32160	Chr6	6	18726359	18727513	AP2 domain containing protein expressed	20	6	2	0
Arenhart et al. 2014	Oryza sativa cv. Nipponbare	LOC_Os06g32990	Chr6	6	19205568	19207119	peroxidase precursor putative expressed	0	5	5	0
Arenhart et al. 2014	Oryza sativa cv. Nipponbare	LOC_Os06g40180	Chr6	6	23921940	23924921	phospholipase D putative expressed	13	9	0	1
Arenhart et al. 2014	Oryza sativa cv. Nipponbare	LOC_Os06g46950	Chr6	6	28483807	28484624	EF hand family protein putative expressed	0	0	0	0
Arenhart et al. 2014	Oryza sativa cv. Nipponbare / Oryza sativa cv. IR64	LOC_Os06g48060	Chr6	6	29072350	29076031	ABC transporter ATP-binding protein putative expressed	0	0	0	0
Arenhart et al. 2014	Oryza sativa cv. Nipponbare	LOC_Os06g48810	Chr6	6	29538934	29541219	OsHKT2 3B1 - Na 2B transporter expressed	2	4	0	0
Arenhart et al. 2014	Oryza sativa cv. Nipponbare	LOC_Os06g50040	Chr6	6	30314749	30315668	OsSAUR29 - Auxin-responsive SAUR gene family member expressed	0	0	0	0
Arenhart et al. 2014	Oryza sativa cv. Nipponbare	LOC_Os07g03279	Chr7	7	1319031	1319803	SCP-like extracellular protein expressed	0	0	0	0
Arenhart et al. 2014	Oryza sativa cv. Nipponbare	LOC_Os07g03730	Chr7	7	1523653	1524629	SCP-like extracellular protein expressed	0	0	0	0
Arenhart et al. 2014	Oryza sativa cv. Nipponbare	LOC_Os07g05420	Chr7	7	2488798	2490442	anthocyanidin 3-O-glucosyltransferase putative expressed	0	0	0	1
Arenhart et al. 2014	Oryza sativa cv. Nipponbare	LOC_Os07g06834	Chr7	7	3339384	3340631	expressed protein	0	0	0	1
Arbelaez et al. 2017	Oryza sativa cv. IR64	LOC_Os07g09420	Chr7	7	4969373	4971156	ATPase, putative, expressed	0	0	0	0
Arenhart et al. 2014	Oryza sativa cv. Nipponbare	LOC_Os07g11739	Chr7	7	6494465	6502011	cytochrome P450 putative expressed	16	1	0	0
Arenhart et al. 2014	Oryza sativa cv. Nipponbare	LOC_Os07g12340	Chr7	7	6967999	6969311	NAC domain-containing protein 67 putative expressed	0	1	0	1
Arenhart et al. 2014	Oryza sativa cv. Nipponbare	LOC_Os07g15460	Chr7	7	8966023	8970882	metal transporter Nramp6 putative expressed	1	0	0	0
Arbelaez et al. 2017	Oryza sativa cv. IR64	LOC_Os07g32570	Chr7	7	19409957	19413252	OsAPRL1 adenosine 5'-phosphosulfate reductase-like OsAPRL1, expressed	2	3	0	1
Arenhart et al. 2014	Oryza sativa cv. Nipponbare	LOC_Os07g35310	Chr7	7	21133028	21140733	TKL_IRAK_DUF26-lc.12 - DUF26 kinases have homology to DUF26 containing loci expressed	0	0	0	0
Arenhart et al. 2014	Oryza sativa cv. Nipponbare	LOC_Os07g36630	Chr7	7	21910216	21915284	CSLF8 - cellulose synthase-like family F 3B beta1 3 3B1 4 glucan synthase expressed	5	3	0	0
Arenhart et al. 2014	Oryza sativa cv. Nipponbare	LOC_Os07g37010	Chr7	7	22169511	22171723	cyclin putative expressed	0	0	0	0
Arbelaez et al. 2017	Oryza sativa cv. IR64	LOC_Os07g37730	Chr7	7	22619086	22621292	NADH-ubiquinone oxidoreductase, mitochondrial precursor, putative, expressed	0	0	0	0
Arbelaez et al. 2017	Oryza sativa cv. IR64	LOC_Os07g41350	Chr7	7	24768073	24769164	B12D protein, putative, expressed	0	0	0	0
Arenhart et al. 2014	Oryza sativa cv. Nipponbare	LOC_Os07g44250	Chr7	7	26445632	26446523	dirigent putative expressed	0	7	0	0
Arbelaez et al. 2017	Oryza sativa cv. IR64	LOC_Os07g44410	Chr7	7	26542980	26545183	WD40-like Beta Propeller Repeat family protein, expressed	0	2	0	0
Arbelaez et al. 2017	Oryza sativa cv. IR64	LOC_Os07g47700	Chr7	7	28494715	28498126	NAD dependent epimerase/dehydratase family domain containing protein, expressed	16	1	0	0
Arenhart et al. 2014	Oryza sativa cv. Nipponbare / Oryza sativa cv. IR64	LOC_Os07g48030	Chr7	7	28678385	28680073	peroxidase precursor putative expressed	0	0	0	0
Arenhart et al. 2014	Oryza sativa cv. Nipponbare / Oryza sativa cv. IR64	LOC_Os08g05960	Chr8	8	3242788	3243439	expressed protein	15	21	0	1
Arbelaez et al. 2017	Oryza sativa cv. IR64	LOC_Os08g05970	Chr8	8	3244621	3244851	expressed protein	0	0	0	1
Arbelaez et al. 2017	Oryza sativa cv. IR64	LOC_Os08g05980	Chr8	8	3248316	3248549	expressed protein	1	2	0	1
Arenhart et al. 2014	Oryza sativa cv. Nipponbare	LOC_Os08g06170	Chr8	8	3408276	3409968	expressed protein	0	0	0	0
Arbelaez et al. 2017	Oryza sativa cv. IR64	LOC_Os08g27170	Chr8	8	16593211	16596190	calmodulin binding protein, putative, expressed	1	4	0	0
Arbelaez et al. 2017	Oryza sativa cv. IR64	LOC_Os08g30510	Chr8	8	18770739	18771329	expressed protein	0	0	0	1
Arbelaez et al. 2017	Oryza sativa cv. IR64	LOC_Os08g31280	Chr8	8	19340472	19341395	DC1, putative, expressed	0	9	0	1
Arenhart et al. 2014	Oryza sativa cv. Nipponbare	LOC_Os08g37180	Chr8	8	23491893	23494532	patatin putative expressed	0	2	0	0
Arbelaez et al. 2017	Oryza sativa cv. IR64	LOC_Os08g37660	Chr8	8	23853216	23854479	plastocyanin-like domain containing protein, putative, expressed	1	0	0	0
Arbelaez et al. 2017	Oryza sativa cv. IR64	LOC_Os08g42490	Chr8	8	26861856	26862848	DC1 domain containing protein, expressed	0	0	0	1
Arbelaez et al. 2017	Oryza sativa cv. IR64	LOC_Os09g09830	Chr9	9	5327470	5330178	heavy-metal-associated domain-containing protein, putative, expressed	0	0	0	0
Arenhart et al. 2014	Oryza sativa cv. Nipponbare / Oryza sativa cv. IR64	LOC_Os09g12480	Chr9	9	7133650	7145978	ulp1 protease family C-terminal catalytic domain containing protein expressed	2	1	0	1
Arbelaez et al. 2017	Oryza sativa cv. IR64	LOC_Os09g13890	Chr9	9	8173211	8177505	calmodulin binding protein, putative, expressed	0	0	0	0
Arenhart et al. 2014	Oryza sativa cv. Nipponbare	LOC_Os09g23530	Chr9	9	13982963	13984701	dehydrogenase putative expressed	0	0	0	0
Arenhart et al. 2014	Oryza sativa cv. Nipponbare	LOC_Os09g23540	Chr9	9	13986804	13988784	dehydrogenase putative expressed	1	0	0	0
Arenhart et al. 2014	Oryza sativa cv. Nipponbare	LOC_Os09g24580	Chr9	9	14635600	14636121	EF hand family protein putative expressed	0	0	0	0
Arenhart et al. 2014	Oryza sativa cv. Nipponbare	LOC_Os09g27510	Chr9	9	16718630	16720923	cytochrome P450 putative expressed	0	0	0	0
Arenhart et al. 2014	Oryza sativa cv. Nipponbare	LOC_Os09g28210	Chr9	9	17132211	17133476	bHelix-loop-helix transcription factor putative expressed	0	4	1	1
Arenhart et al. 2014	Oryza sativa cv. Nipponbare	LOC_Os09g29710	Chr9	9	18067434	18068462	beta-expansin precursor putative expressed	0	0	0	0
Arbelaez et al. 2017	Oryza sativa cv. IR64	LOC_Os09g31031	Chr9	9	18669317	18671727	ubiquitin family protein, putative, expressed	0	4	0	1
Arenhart et al. 2014	Oryza sativa cv. Nipponbare	LOC_Os09g35010	Chr9	9	20395224	20396205	dehydration-responsive element-binding protein putative expressed	31	2	0	0
Arenhart et al. 2014	Oryza sativa cv. Nipponbare	LOC_Os09g35020	Chr9	9	20399334	20400263	THION7 - Plant thionin family protein precursor expressed	0	0	0	0
Arenhart et al. 2014	Oryza sativa cv. Nipponbare	LOC_Os09g35030	Chr9	9	20403149	20404332	dehydration-responsive element-binding protein putative expressed	0	0	0	0
Arenhart et al. 2014	Oryza sativa cv. Nipponbare	LOC_Os09g37510	Chr9	9	21610090	21613089	DUF292 domain containing protein expressed	0	0	0	0
Arbelaez et al. 2017	Oryza sativa cv. IR64	LOC_Os10g10540	Chr10	10	5821225	5828147	cysteine-rich repeat secretory protein precursor, putative, expressed	3	9	0	1
Arenhart et al. 2014	Oryza sativa cv. Nipponbare	LOC_Os10g11889	Chr10	10	6597053	6599560	expressed protein	3	0	0	1
Arenhart et al. 2014	Oryza sativa cv. Nipponbare	LOC_Os10g13940	Chr10	10	7574036	7579887	MATE efflux protein putative expressed	1	0	0	0
Arenhart et al. 2014	Oryza sativa cv. Nipponbare	LOC_Os10g18760	Chr10	10	9541399	9542986	dirigent putative expressed	0	0	0	0
Arenhart et al. 2014	Oryza sativa cv. Nipponbare	LOC_Os10g18820	Chr10	10	9582845	9584360	dirigent putative expressed	0	0	0	0
Arenhart et al. 2014	Oryza sativa cv. Nipponbare	LOC_Os10g18870	Chr10	10	9616694	9618180	dirigent putative expressed	0	0	0	0
Arenhart et al. 2014	Oryza sativa cv. Nipponbare	LOC_Os10g31500	Chr10	10	16500660	16501740	retrotransposon protein putative unclassified expressed	0	0	0	1
Arenhart et al. 2014	Oryza sativa cv. Nipponbare	LOC_Os10g32110	Chr10	10	16861659	16863255	exostosin family domain containing protein expressed	0	0	0	0
Arbelaez et al. 2017	Oryza sativa cv. IR64	LOC_Os10g35460	Chr10	10	18976009	18979110	COBRA, putative, expressed	0	1	0	0
Arenhart et al. 2014	Oryza sativa cv. Nipponbare	LOC_Os10g36500	Chr10	10	19530117	19532281	invertase pectin methylesterase inhibitor family protein putative expressed	4	7	0	0
Arbelaez et al. 2017	Oryza sativa cv. IR64	LOC_Os10g36580	Chr10	10	19568640	19569328	UP-9A, putative, expressed	0	0	0	0
Arenhart et al. 2014	Oryza sativa cv. Nipponbare	LOC_Os10g36924	Chr10	10	19778055	19785158	aquaporin protein putative expressed	80	34	0	0
Arbelaez et al. 2017	Oryza sativa cv. IR64	LOC_Os10g38340	Chr10	10	20488627	20489894	glutathione S-transferase GSTU6, putative, expressed	0	0	0	0
Arenhart et al. 2014	Oryza sativa cv. Nipponbare	LOC_Os10g39700	Chr10	10	21219485	21222247	CHIT15 - Chitinase family protein precursor putative expressed	14	9	2	0
Arbelaez et al. 2017	Oryza sativa cv. IR64	LOC_Os10g40430	Chr10	10	21658070	21658866	LTPL139 - Protease inhibitor/seed storage/LTP family protein precursor, expressed	0	0	0	1
Arenhart et al. 2014	Oryza sativa cv. Nipponbare	LOC_Os10g40600	Chr10	10	21757768	21762202	peptide transporter PTR2 putative expressed	125	135	0	0
Arbelaez et al. 2017	Oryza sativa cv. IR64	LOC_Os10g42780	Chr10	10	23075396	23079075	lrgB-like family protein, expressed	0	0	0	1
Arbelaez et al. 2017	Oryza sativa cv. IR64	LOC_Os11g01780	Chr11	11	417564	421226	F-box/LRR-repeat protein 3, putative, expressed	0	0	0	0
Arenhart et al. 2014	Oryza sativa cv. Nipponbare	LOC_Os11g04020	Chr11	11	1618494	1623978	major facilitator superfamily antiporter putative expressed	0	0	0	0
Arbelaez et al. 2017	Oryza sativa cv. IR64	LOC_Os11g04290	Chr11	11	1775407	1777730	cytochrome P450, putative, expressed	0	2	0	0
Arenhart et al. 2014	Oryza sativa cv. Nipponbare	LOC_Os11g06980	Chr11	11	3463899	3468002	BURP domain containing protein expressed	8	6	0	0
Arenhart et al. 2014	Oryza sativa cv. Nipponbare	LOC_Os11g07770	Chr11	11	3959111	3959861	dirigent putative expressed	0	0	0	0
Arbelaez et al. 2017	Oryza sativa cv. IR64	LOC_Os11g10470	Chr11	11	5710546	5711249	expressed protein	3	0	0	1
Arbelaez et al. 2017	Oryza sativa cv. IR64	LOC_Os11g15040	Chr11	11	8466832	8469354	S-adenosyl-L-methionine:benzoic acid/salicylic acid carboxyl methyltransferase, putative, expressed	10	4	0	0
Arenhart et al. 2014	Oryza sativa cv. Nipponbare	LOC_Os11g15624	Chr11	11	8864461	8867281	expressed protein	0	1	0	1
Arenhart et al. 2014	Oryza sativa cv. Nipponbare	LOC_Os11g20040	Chr11	11	11538278	11540905	O-methyltransferase putative expressed	6	10	0	0
Arenhart et al. 2014	Oryza sativa cv. Nipponbare	LOC_Os11g20090	Chr11	11	11591503	11596168	O-methyltransferase putative expressed	1	0	1	0
Arbelaez et al. 2017	Oryza sativa cv. IR64	LOC_Os11g25720	Chr11	11	14663220	14675381	cytokinin-N-glucosyltransferase 1, putative, expressed	24	4	2	1
Arbelaez et al. 2017	Oryza sativa cv. IR64	LOC_Os11g29780	Chr11	11	17284028	17285405	plant-specific domain TIGR01627 family protein, expressed	0	0	0	0
Arbelaez et al. 2017	Oryza sativa cv. IR64	LOC_Os11g30910	Chr11	11	17984964	17986719	sulfotransferase domain containing protein, expressed	0	0	0	1
Arbelaez et al. 2017	Oryza sativa cv. IR64	LOC_Os11g36890	Chr11	11	21761231	21763662	expressed protein	0	2	0	1
Arenhart et al. 2014	Oryza sativa cv. Nipponbare	LOC_Os11g39420	Chr11	11	23459658	23475516	jacalin-like lectin domain containing protein expressed	33	9	0	0
Arenhart et al. 2014	Oryza sativa cv. Nipponbare	LOC_Os11g39530	Chr11	11	23537272	23545497	jacalin-like lectin domain containing protein expressed	0	0	0	0
Arenhart et al. 2014	Oryza sativa cv. Nipponbare	LOC_Os11g40970	Chr11	11	24533669	24537481	receptor-like protein kinase precursor putative expressed	2	3	0	1
Arenhart et al. 2014	Oryza sativa cv. Nipponbare	LOC_Os11g45740	Chr11	11	27670321	27673334	MYB family transcription factor putative expressed	1	0	0	0
Arenhart et al. 2014	Oryza sativa cv. Nipponbare	LOC_Os11g46950	Chr11	11	28215210	28223264	wall-associated receptor kinase-like 18 precursor putative expressed	14	9	0	1
Arbelaez et al. 2017	Oryza sativa cv. IR64	LOC_Os12g01760	Chr12	12	464682	468351	F-box/LRR domain containing protein, putative, expressed	21	11	0	0
Arbelaez et al. 2017	Oryza sativa cv. IR64	LOC_Os12g02080	Chr12	12	623549	626113	peroxidase precursor, putative, expressed	0	0	0	0
Arbelaez et al. 2017	Oryza sativa cv. IR64	LOC_Os12g05860	Chr12	12	2692485	2693511	Cupin domain containing protein, expressed	1	0	0	0
Arbelaez et al. 2017	Oryza sativa cv. IR64	LOC_Os12g05880	Chr12	12	2699175	2700272	Cupin domain containing protein, expressed	0	0	0	0
Arenhart et al. 2014	Oryza sativa cv. Nipponbare / Oryza sativa cv. IR64	LOC_Os12g06660	Chr12	12	3231450	3234554	actin putative expressed	0	0	0	0
Arbelaez et al. 2017	Oryza sativa cv. IR64	LOC_Os12g08930	Chr12	12	4656472	4657023	expressed protein	0	0	0	1
Arenhart et al. 2014	Oryza sativa cv. Nipponbare	LOC_Os12g10750	Chr12	12	5775600	5776808	ARGOS putative expressed	0	0	0	1
Arenhart et al. 2014	Oryza sativa cv. Nipponbare	LOC_Os12g16010	Chr12	12	9124112	9125447	sex determination protein tasselseed-2 putative expressed	2	1	0	1
Arenhart et al. 2014	Oryza sativa cv. Nipponbare	LOC_Os12g18410	Chr12	12	10651961	10653450	expressed protein	0	0	0	1
Arenhart et al. 2014	Oryza sativa cv. Nipponbare	LOC_Os12g26960	Chr12	12	15788561	15789163	THION34 - Plant thionin family protein precursor expressed	0	0	0	0
Arbelaez et al. 2017	Oryza sativa cv. IR64	LOC_Os12g29400	Chr12	12	17463629	17465265	GRAM domain containing protein, expressed	0	0	0	0
Arenhart et al. 2014	Oryza sativa cv. Nipponbare	LOC_Os12g32850	Chr12	12	19848807	19851543	cytochrome P450 putative expressed	0	0	0	0
Arbelaez et al. 2017	Oryza sativa cv. IR64	LOC_Os12g37690	Chr12	12	23135056	23137352	MYB family transcription factor, putative, expressed	0	0	0	0
Arenhart et al. 2014	Oryza sativa cv. Nipponbare	LOC_Os12g38010	Chr12	12	23352191	23353189	metallothionein putative expressed	1	2	0	0
Arenhart et al. 2014	Oryza sativa cv. Nipponbare	LOC_Os12g38040	Chr12	12	23376322	23379305	metallothionein family protein expressed	2	3	0	0
Arenhart et al. 2014	Oryza sativa cv. Nipponbare	LOC_Os12g38051	Chr12	12	23382984	23391427	metallothionein putative expressed	2	0	0	1
Arenhart et al. 2014	Oryza sativa cv. Nipponbare	LOC_Os12g38270	Chr12	12	23501361	23502386	metallothionein putative expressed	0	0	0	0
Arenhart et al. 2014	Oryza sativa cv. Nipponbare	LOC_Os12g38290	Chr12	12	23512497	23513477	metallothionein putative expressed	0	0	0	0
Arenhart et al. 2014	Oryza sativa cv. Nipponbare	LOC_Os12g42010	Chr12	12	26045658	26046812	lipase class 3 family protein putative expressed	0	0	0	0
Arenhart et al. 2014	Oryza sativa cv. Nipponbare	LOC_Os12g42220	Chr12	12	26194509	26195982	expressed protein	0	0	0	1
Arbelaez et al. 2017	Oryza sativa cv. IR64	LOC_Os12g42860	Chr12	12	26629915	26632625	2-aminoethanethiol dioxygenase, putative, expressed	0	0	0	0
MGT1	Oryza sativa	LOC_Os01g64890	ChrUn	1	37664117	37667349	CorA-like magnesium transporter protein, putative, expressed	0	0	0	0
STAR2	Oryza sativa	LOC_Os05g02750	Chr5	5	989743	990588	ABC transporter, membrane-spanning/permease subunit, putative, expressed	0	2	0	1
ART1	Oryza sativa	LOC_Os12g07280	Chr12	12	3580032	3582974	ZOS12-02 - C2H2 zinc finger protein, expressed	0	0	0	0

## Sheet: Suppl_table2
Source	Species/Cultivar	GENES	CHR	Chromosome	Start	End	Annotation	IR64 (SNPs)	PK (SNPs)	NIPPONBARE (SNPs)	PARALOGOUS
Arenhart et al. 2014	Oryza sativa cv. Nipponbare	LOC_Os01g03950	ChrUn	1	1698203	1703090	glycosyl hydrolase family 31 putative expressed	0	0	0	0
Arenhart et al. 2014	Oryza sativa cv. Nipponbare	LOC_Os01g07530	ChrUn	1	3598418	3602211	uncharacterized glycosyltransferase putative expressed	0	0	0	0
Arenhart et al. 2014	Oryza sativa cv. Nipponbare	LOC_Os01g11620	ChrUn	1	6267440	6270903	GDSL-like lipase acylhydrolase putative expressed	0	0	0	0
Arenhart et al. 2014	Oryza sativa cv. Nipponbare	LOC_Os01g12070	ChrUn	1	6564673	6568151	endoglucanase precursor putative expressed	0	0	0	0
Arbelaez et al. 2017	Oryza sativa cv. IR64	LOC_Os01g42380	ChrUn	1	24075065	24082181	pleiotropic drug resistance protein, putative, expressed	1	0	0	0
Arbelaez et al. 2017	Oryza sativa cv. IR64	LOC_Os01g43720	ChrUn	1	25055772	25058195	cytochrome P450 72A1, putative, expressed	0	0	0	1
Arbelaez et al. 2017	Oryza sativa cv. IR64	LOC_Os01g43774	ChrUn	1	25073849	25078549	cytochrome P450 72A1, putative, expressed	0	18	0	0
Arbelaez et al. 2017	Oryza sativa cv. IR64	LOC_Os01g50100	ChrUn	1	28786109	28793300	ABC transporter, ATP-binding protein, putative, expressed	1	2	0	0
Arbelaez et al. 2017	Oryza sativa cv. IR64	LOC_Os01g51360	ChrUn	1	29529726	29532847	lipase, putative, expressed	0	0	0	0
Arbelaez et al. 2017	Oryza sativa cv. IR64	LOC_Os01g53090	ChrUn	1	30512276	30521565	pathogen-related protein, putative, expressed	9	12	0	0
Arbelaez et al. 2017	Oryza sativa cv. IR64	LOC_Os01g53350	ChrUn	1	30655289	30657194	anthocyanidin 5,3-O-glucosyltransferase, putative, expressed	0	1	0	1
Arenhart et al. 2014	Oryza sativa cv. Nipponbare	LOC_Os01g65880	ChrUn	1	38254049	38257687	nodulin MtN3 family protein putative expressed	1	1	0	0
Arenhart et al. 2014	Oryza sativa cv. Nipponbare / Oryza sativa cv. IR64	LOC_Os01g69010	ChrUn	1	40093713	40096983	MATE efflux protein putative expressed	0	1	0	0
Arenhart et al. 2014	Oryza sativa cv. Nipponbare	LOC_Os01g72370	ChrUn	1	41971444	41978408	helix-loop-helix DNA-binding domain containing protein expressed	0	0	0	0
Arenhart et al. 2014	Oryza sativa cv. Nipponbare	LOC_Os02g03870	Chr2	2	1643966	1648808	periplasmic beta-glucosidase precursor putative expressed	2	1	0	0
Arbelaez et al. 2017	Oryza sativa cv. IR64	LOC_Os02g03900	Chr2	2	1658576	1662644	metal transporter Nramp6, putative, expressed	0	0	0	0
Arbelaez et al. 2017	Oryza sativa cv. IR64	LOC_Os02g08330	Chr2	2	4424439	4426620	gp176, putative, expressed	0	0	0	0
Arbelaez et al. 2017	Oryza sativa cv. IR64	LOC_Os02g20360	Chr2	2	11997094	12002633	tyrosine aminotransferase, putative, expressed	20	5	0	0
Arenhart et al. 2014	Oryza sativa cv. Nipponbare	LOC_Os02g36210	Chr2	2	21841059	21847837	ent-kaurene synthase chloroplast precursor putative expressed	0	28	0	0
Arbelaez et al. 2017	Oryza sativa cv. IR64	LOC_Os03g02750	Chr3	3	1033961	1036671	OsSub25 - Putative Subtilisin homologue, expressed	0	0	0	0
Arenhart et al. 2014	Oryza sativa cv. Nipponbare	LOC_Os03g04550	Chr3	3	2123688	2125737	expressed protein	0	0	0	1
Arenhart et al. 2014	Oryza sativa cv. Nipponbare	LOC_Os03g05910	Chr3	3	2961746	2964306	expressed protein	0	1	0	0
Arenhart et al. 2014	Oryza sativa cv. Nipponbare	LOC_Os03g11400	Chr3	3	5865076	5869280	targeting protein-related putative expressed	1	0	0	0
Arenhart et al. 2014	Oryza sativa cv. Nipponbare	LOC_Os03g11950	Chr3	3	6264770	6267879	SEC14 cytosolic factor family protein putative expressed	0	0	0	0
Arbelaez et al. 2017	Oryza sativa cv. IR64	LOC_Os03g16610	Chr3	3	9167558	9170334	laccase precursor protein, putative, expressed	0	0	0	0
Arenhart et al. 2014	Oryza sativa cv. Nipponbare	LOC_Os03g18030	Chr3	3	10038840	10044429	leucoanthocyanidin dioxygenase putative expressed	0	0	0	1
Arbelaez et al. 2017	Oryza sativa cv. IR64	LOC_Os03g22010	Chr3	3	12611811	12617166	peroxidase precursor, putative, expressed	0	2	0	0
Arenhart et al. 2014	Oryza sativa cv. Nipponbare	LOC_Os03g44890	Chr3	3	25326521	25330063	anthranilate phosphoribosyltransferase putative expressed	5	0	0	0
Arbelaez et al. 2017	Oryza sativa cv. IR64	LOC_Os03g55240	Chr3	3	31440748	31446119	cytochrome P450, putative, expressed	0	3	0	0
Arenhart et al. 2014	Oryza sativa cv. Nipponbare	LOC_Os04g01690	Chr4	4	463738	467284	pyridoxal-dependent decarboxylase protein putative expressed	22	11	0	0
Arenhart et al. 2014	Oryza sativa cv. Nipponbare	LOC_Os04g27190	Chr4	4	16057927	16068256	terpene synthase putative expressed	17	19	0	0
Arbelaez et al. 2017	Oryza sativa cv. IR64	LOC_Os04g33640	Chr4	4	20372913	20377959	glycosyl hydrolases family 17, putative, expressed	0	0	0	0
Arbelaez et al. 2017	Oryza sativa cv. IR64	LOC_Os05g09440	Chr5	5	5293555	5297419	NADP-dependent malic enzyme, chloroplast precursor, putative, expressed	3	2	0	0
Arenhart et al. 2014	Oryza sativa cv. Nipponbare	LOC_Os05g31570	Chr5	5	18377097	18382814	disease resistance protein RGA4 putative expressed	0	2	0	1
Arenhart et al. 2014	Oryza sativa cv. Nipponbare	LOC_Os05g34010	Chr5	5	20086679	20091534	peptide transporter PTR2 putative expressed	0	1	0	1
Arbelaez et al. 2017	Oryza sativa cv. IR64	LOC_Os05g39540	Chr5	5	23204531	23213279	metal cation transporter, putative, expressed	0	0	0	1
Arbelaez et al. 2017	Oryza sativa cv. IR64	LOC_Os05g44940	Chr5	5	26120363	26126935	protein kinase domain containing protein, expressed	12	0	1	1
Arbelaez et al. 2017	Oryza sativa cv. IR64	LOC_Os05g51470	Chr5	5	29506977	29509972	2-aminoethanethiol dioxygenase, putative, expressed	0	0	0	0
Arenhart et al. 2014	Oryza sativa cv. Nipponbare	LOC_Os06g03710	Chr6	6	1465499	1468600	DELLA protein SLR1 putative expressed	41	38	0	1
Arenhart et al. 2014	Oryza sativa cv. Nipponbare	LOC_Os06g14406	Chr6	6	8043564	8049979	SYD putative expressed	1	0	0	1
Arenhart et al. 2014	Oryza sativa cv. Nipponbare	LOC_Os06g40180	Chr6	6	23921940	23924921	phospholipase D putative expressed	13	9	0	1
Arenhart et al. 2014	Oryza sativa cv. Nipponbare / Oryza sativa cv. IR64	LOC_Os06g48060	Chr6	6	29072350	29076031	ABC transporter ATP-binding protein putative expressed	0	0	0	0
Arenhart et al. 2014	Oryza sativa cv. Nipponbare	LOC_Os07g11739	Chr7	7	6494465	6502011	cytochrome P450 putative expressed	16	1	0	0
Arenhart et al. 2014	Oryza sativa cv. Nipponbare	LOC_Os07g15460	Chr7	7	8966023	8970882	metal transporter Nramp6 putative expressed	1	0	0	0
Arbelaez et al. 2017	Oryza sativa cv. IR64	LOC_Os07g32570	Chr7	7	19409957	19413252	OsAPRL1 adenosine 5'-phosphosulfate reductase-like OsAPRL1, expressed	2	3	0	1
Arenhart et al. 2014	Oryza sativa cv. Nipponbare	LOC_Os07g35310	Chr7	7	21133028	21140733	TKL_IRAK_DUF26-lc.12 - DUF26 kinases have homology to DUF26 containing loci expressed	0	0	0	0
Arenhart et al. 2014	Oryza sativa cv. Nipponbare	LOC_Os07g36630	Chr7	7	21910216	21915284	CSLF8 - cellulose synthase-like family F 3B beta1 3 3B1 4 glucan synthase expressed	5	3	0	0
Arbelaez et al. 2017	Oryza sativa cv. IR64	LOC_Os07g44410	Chr7	7	26542980	26545183	WD40-like Beta Propeller Repeat family protein, expressed	0	2	0	0
Arenhart et al. 2014	Oryza sativa cv. Nipponbare / Oryza sativa cv. IR64	LOC_Os09g12480	Chr9	9	7133650	7145978	ulp1 protease family C-terminal catalytic domain containing protein expressed	2	1	0	1
Arbelaez et al. 2017	Oryza sativa cv. IR64	LOC_Os09g13890	Chr9	9	8173211	8177505	calmodulin binding protein, putative, expressed	0	0	0	0
Arenhart et al. 2014	Oryza sativa cv. Nipponbare	LOC_Os09g27510	Chr9	9	16718630	16720923	cytochrome P450 putative expressed	0	0	0	0
Arenhart et al. 2014	Oryza sativa cv. Nipponbare	LOC_Os09g37510	Chr9	9	21610090	21613089	DUF292 domain containing protein expressed	0	0	0	0
Arbelaez et al. 2017	Oryza sativa cv. IR64	LOC_Os10g10540	Chr10	10	5821225	5828147	cysteine-rich repeat secretory protein precursor, putative, expressed	3	9	0	1
Arenhart et al. 2014	Oryza sativa cv. Nipponbare	LOC_Os10g13940	Chr10	10	7574036	7579887	MATE efflux protein putative expressed	1	0	0	0
Arenhart et al. 2014	Oryza sativa cv. Nipponbare	LOC_Os10g36924	Chr10	10	19778055	19785158	aquaporin protein putative expressed	80	34	0	0
Arenhart et al. 2014	Oryza sativa cv. Nipponbare	LOC_Os10g40600	Chr10	10	21757768	21762202	peptide transporter PTR2 putative expressed	125	135	0	0
Arbelaez et al. 2017	Oryza sativa cv. IR64	LOC_Os10g42780	Chr10	10	23075396	23079075	lrgB-like family protein, expressed	0	0	0	1
Arenhart et al. 2014	Oryza sativa cv. Nipponbare	LOC_Os11g04020	Chr11	11	1618494	1623978	major facilitator superfamily antiporter putative expressed	0	0	0	0
Arenhart et al. 2014	Oryza sativa cv. Nipponbare	LOC_Os11g06980	Chr11	11	3463899	3468002	BURP domain containing protein expressed	8	6	0	0
Arbelaez et al. 2017	Oryza sativa cv. IR64	LOC_Os11g15040	Chr11	11	8466832	8469354	S-adenosyl-L-methionine:benzoic acid/salicylic acid carboxyl methyltransferase, putative, expressed	10	4	0	0
Arenhart et al. 2014	Oryza sativa cv. Nipponbare	LOC_Os11g20090	Chr11	11	11591503	11596168	O-methyltransferase putative expressed	1	0	1	0
Arbelaez et al. 2017	Oryza sativa cv. IR64	LOC_Os11g25720	Chr11	11	14663220	14675381	cytokinin-N-glucosyltransferase 1, putative, expressed	24	4	2	1
Arenhart et al. 2014	Oryza sativa cv. Nipponbare	LOC_Os11g39420	Chr11	11	23459658	23475516	jacalin-like lectin domain containing protein expressed	33	9	0	0
Arenhart et al. 2014	Oryza sativa cv. Nipponbare	LOC_Os11g39530	Chr11	11	23537272	23545497	jacalin-like lectin domain containing protein expressed	0	0	0	0
Arenhart et al. 2014	Oryza sativa cv. Nipponbare	LOC_Os11g46950	Chr11	11	28215210	28223264	wall-associated receptor kinase-like 18 precursor putative expressed	14	9	0	1
Arbelaez et al. 2017	Oryza sativa cv. IR64	LOC_Os12g02080	Chr12	12	623549	626113	peroxidase precursor, putative, expressed	0	0	0	0
Arenhart et al. 2014	Oryza sativa cv. Nipponbare / Oryza sativa cv. IR64	LOC_Os12g06660	Chr12	12	3231450	3234554	actin putative expressed	0	0	0	0
Arenhart et al. 2014	Oryza sativa cv. Nipponbare	LOC_Os12g32850	Chr12	12	19848807	19851543	cytochrome P450 putative expressed	0	0	0	0
Arenhart et al. 2014	Oryza sativa cv. Nipponbare	LOC_Os12g38051	Chr12	12	23382984	23391427	metallothionein putative expressed	2	0	0	1
Arbelaez et al. 2017	Oryza sativa cv. IR64	LOC_Os12g42860	Chr12	12	26629915	26632625	2-aminoethanethiol dioxygenase, putative, expressed	0	0	0	0
MGT1	Oryza sativa	LOC_Os01g64890	ChrUn	1	37664117	37667349	CorA-like magnesium transporter protein, putative, expressed	0	0	0	0
ART1	Oryza sativa	LOC_Os12g07280	Chr12	12	3580032	3582974	ZOS12-02 - C2H2 zinc finger protein, expressed	0	0	0	0

## Sheet: Suppl_table3
Source	Species/Cultivar	GENES	CHR	Chromosome	Start	End	Annotation	IR64 (SNPs)	PK (SNPs)	NIPPONBARE (SNPs)	PARALOGOUS
Arenhart et al. 2014	Oryza sativa cv. Nipponbare	LOC_Os01g03950	ChrUn	1	1698203	1703090	glycosyl hydrolase family 31 putative expressed	0	0	0	0
Arenhart et al. 2014	Oryza sativa cv. Nipponbare	LOC_Os01g07530	ChrUn	1	3598418	3602211	uncharacterized glycosyltransferase putative expressed	0	0	0	0
Arenhart et al. 2014	Oryza sativa cv. Nipponbare	LOC_Os01g11620	ChrUn	1	6267440	6270903	GDSL-like lipase acylhydrolase putative expressed	0	0	0	0
Arenhart et al. 2014	Oryza sativa cv. Nipponbare	LOC_Os01g12070	ChrUn	1	6564673	6568151	endoglucanase precursor putative expressed	0	0	0	0
Arbelaez et al. 2017	Oryza sativa cv. IR64	LOC_Os01g51360	ChrUn	1	29529726	29532847	lipase, putative, expressed	0	0	0	0
Arenhart et al. 2014	Oryza sativa cv. Nipponbare	LOC_Os01g72370	ChrUn	1	41971444	41978408	helix-loop-helix DNA-binding domain containing protein expressed	0	0	0	0
Arbelaez et al. 2017	Oryza sativa cv. IR64	LOC_Os02g03900	Chr2	2	1658576	1662644	metal transporter Nramp6, putative, expressed	0	0	0	0
Arbelaez et al. 2017	Oryza sativa cv. IR64	LOC_Os02g08330	Chr2	2	4424439	4426620	gp176, putative, expressed	0	0	0	0
Arbelaez et al. 2017	Oryza sativa cv. IR64	LOC_Os03g02750	Chr3	3	1033961	1036671	OsSub25 - Putative Subtilisin homologue, expressed	0	0	0	0
Arenhart et al. 2014	Oryza sativa cv. Nipponbare	LOC_Os03g11950	Chr3	3	6264770	6267879	SEC14 cytosolic factor family protein putative expressed	0	0	0	0
Arbelaez et al. 2017	Oryza sativa cv. IR64	LOC_Os03g16610	Chr3	3	9167558	9170334	laccase precursor protein, putative, expressed	0	0	0	0
Arbelaez et al. 2017	Oryza sativa cv. IR64	LOC_Os04g33640	Chr4	4	20372913	20377959	glycosyl hydrolases family 17, putative, expressed	0	0	0	0
Arbelaez et al. 2017	Oryza sativa cv. IR64	LOC_Os05g51470	Chr5	5	29506977	29509972	2-aminoethanethiol dioxygenase, putative, expressed	0	0	0	0
Arenhart et al. 2014	Oryza sativa cv. Nipponbare / Oryza sativa cv. IR64	LOC_Os06g48060	Chr6	6	29072350	29076031	ABC transporter ATP-binding protein putative expressed	0	0	0	0
Arenhart et al. 2014	Oryza sativa cv. Nipponbare	LOC_Os07g35310	Chr7	7	21133028	21140733	TKL_IRAK_DUF26-lc.12 - DUF26 kinases have homology to DUF26 containing loci expressed	0	0	0	0
Arbelaez et al. 2017	Oryza sativa cv. IR64	LOC_Os09g13890	Chr9	9	8173211	8177505	calmodulin binding protein, putative, expressed	0	0	0	0
Arenhart et al. 2014	Oryza sativa cv. Nipponbare	LOC_Os09g27510	Chr9	9	16718630	16720923	cytochrome P450 putative expressed	0	0	0	0
Arenhart et al. 2014	Oryza sativa cv. Nipponbare	LOC_Os09g37510	Chr9	9	21610090	21613089	DUF292 domain containing protein expressed	0	0	0	0
Arenhart et al. 2014	Oryza sativa cv. Nipponbare	LOC_Os11g04020	Chr11	11	1618494	1623978	major facilitator superfamily antiporter putative expressed	0	0	0	0
Arenhart et al. 2014	Oryza sativa cv. Nipponbare	LOC_Os11g39530	Chr11	11	23537272	23545497	jacalin-like lectin domain containing protein expressed	0	0	0	0
Arbelaez et al. 2017	Oryza sativa cv. IR64	LOC_Os12g02080	Chr12	12	623549	626113	peroxidase precursor, putative, expressed	0	0	0	0
Arenhart et al. 2014	Oryza sativa cv. Nipponbare / Oryza sativa cv. IR64	LOC_Os12g06660	Chr12	12	3231450	3234554	actin putative expressed	0	0	0	0
Arenhart et al. 2014	Oryza sativa cv. Nipponbare	LOC_Os12g32850	Chr12	12	19848807	19851543	cytochrome P450 putative expressed	0	0	0	0
Arbelaez et al. 2017	Oryza sativa cv. IR64	LOC_Os12g42860	Chr12	12	26629915	26632625	2-aminoethanethiol dioxygenase, putative, expressed	0	0	0	0
MGT1	Oryza sativa	LOC_Os01g64890	ChrUn	1	37664117	37667349	CorA-like magnesium transporter protein, putative, expressed	0	0	0	0
ART1	Oryza sativa	LOC_Os12g07280	Chr12	12	3580032	3582974	ZOS12-02 - C2H2 zinc finger protein, expressed	0	0	0	0
